# Supplementary material for: Short-term changes in human metabolism following a 5-h delay of the light-dark and behavioral cycle
Source: PubMed Central journal article supplement (PMC11607541; doi:10.1016/j.isci.2024.111161), 2024-10-11
Supplement: mmc1.pdf [file mmc1.pdf]

**Supplemental information**

**Short-term changes in human metabolism  
following a 5-h delay of the light-dark  
and behavioral cycle**

**Alan Flanagan, Leonie C. Ruddick-Collins, Barbara Fielding, Benita Middleton, Johanna von Gerichten, Michael Short, Victoria Revell, Jeewaka Mendis, Claus-Dieter Mayer, Peter J. Morgan, Alexandra M. Johnstone, and Jonathan D. Johnston**

**Figure S1: Sleep Parameters Estimated from Actigraphy**

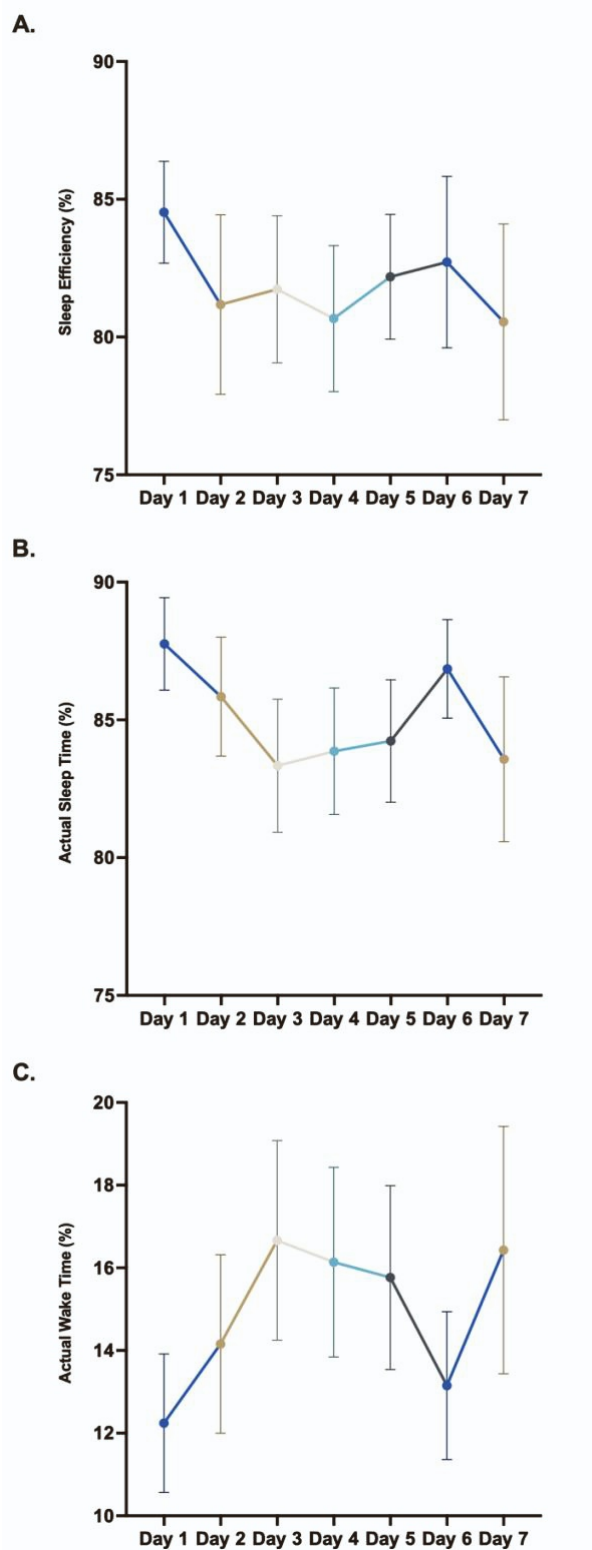

**Figure S1.** All data are presented as bars with mean and standard error. **A.** Sleep efficiency [as a percentage of total sleep time]; **B.** Actual sleep time [as a percentage of total sleep time]; **C.** Actual wake time [as a percentage of total sleep time]. Measured by actigraphy during the 8 h laboratory sleep opportunity before and after the phase shift. No significant differences in any of the sleep parameters measured [1-Way Repeated Measures ANOVA].

**Figure S2: Postprandial Measures by Main Effect of Meal**

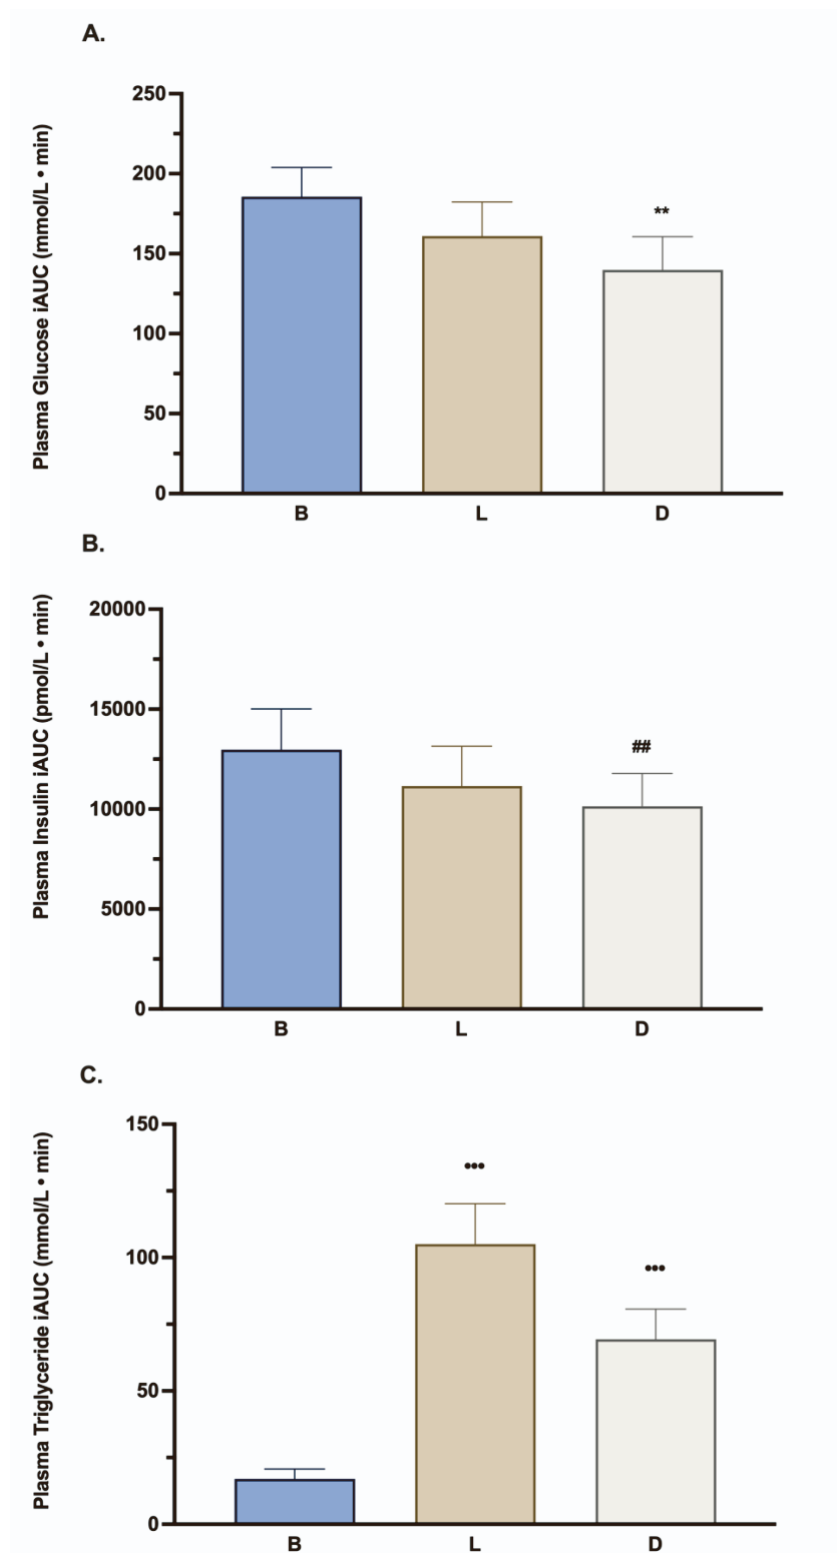

**Figure S2.** All data are presented as bars with mean and standard error. **A.** Postprandial plasma glucose incremental area under the curve [iAUC; mmol/L · min] for the main effect of meal. \*\*  $p < 0.01$  for the difference in main effect of meal comparing dinner to breakfast. **B.** Postprandial plasma insulin iAUC [pmol/L · min] for the main effect of meal. ##  $p < 0.01$  for the difference in main effect of meal comparing dinner to breakfast. **C.** Postprandial plasma triglycerides [TG] iAUC [mmol/L · min] for the main effect of meal; \*\*\*  $p < 0.001$  for the difference in plasma TG iAUC comparing lunch to breakfast, and comparing dinner to breakfast, respectively.

**Figure S3: Subjective Hunger/Appetite Measures**

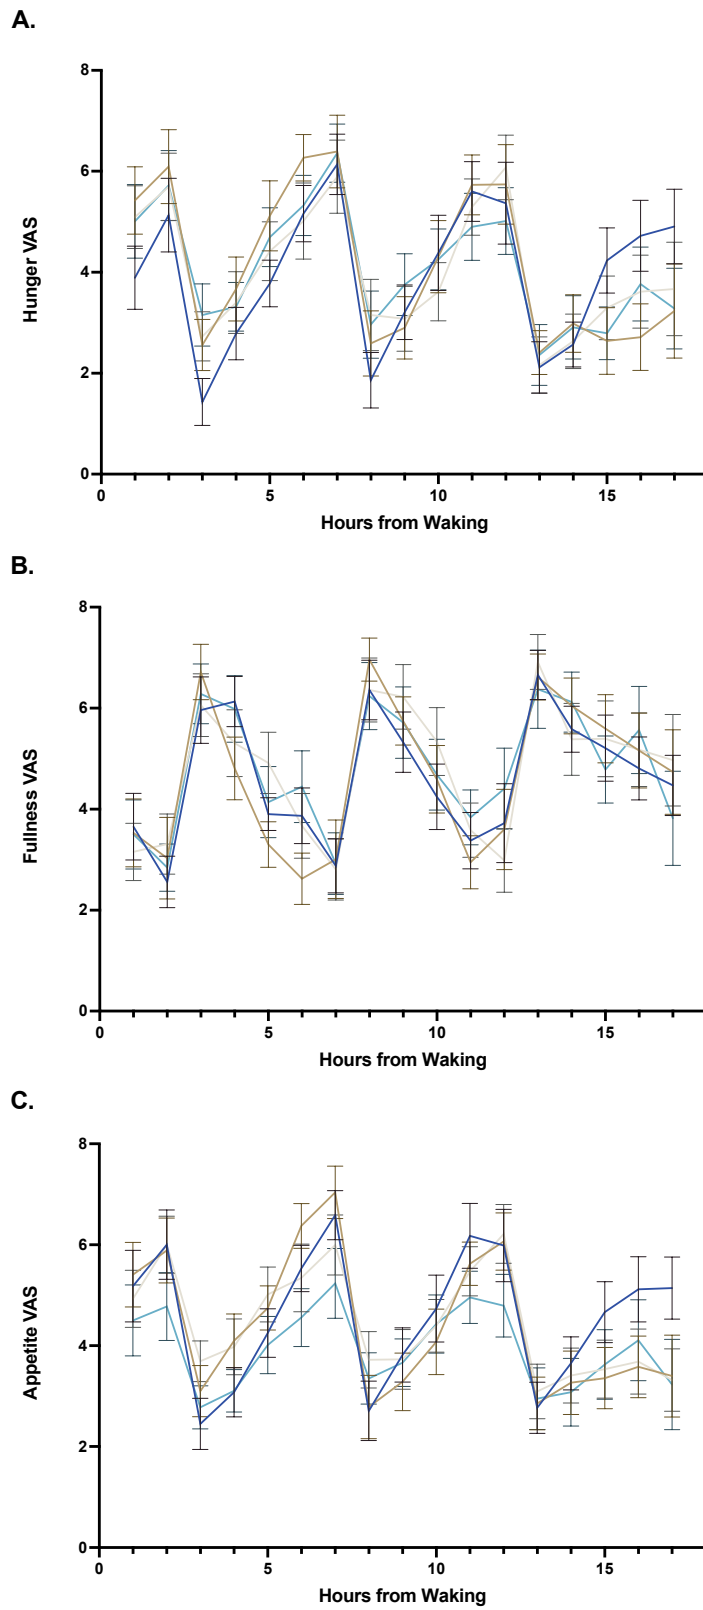

**Figure S3.** All data are presented as mean and standard error. Visual analogue scale measures of **A.** Appetite; **b.** Hunger, and; **C.** Fullness, between test days [Black = Day 2; Red = Day 3; Green = Day 5; Purple = Day 7].

**Table S1: Dietary Energy, Macronutrient Content, and Food Weight**

|                                          | Weight Food (g) | Energy (kJ)    | Energy (kcal)  | Fat (g)     | Protein (g) | Carb (g)     | %Fat       | %Protein   | %Carb      |
|------------------------------------------|-----------------|----------------|----------------|-------------|-------------|--------------|------------|------------|------------|
| <b>Day 1</b>                             | 2134.8 ± 114.6  | 9269.9 ± 387.3 | 2217.7 ± 92.7  | 83.8 ± 3.7  | 112.4 ± 4.6 | 255.9 ± 10.8 | 33.4 ± 0.2 | 20.6 ± 0.1 | 44.2 ± 0.1 |
| <b>Day 2<br/>(TEST<br/>DAY)</b>          | 2616 ± 162.2    | 12417 ± 558    | 2970.6 ± 133.5 | 112.2 ± 5.3 | 146.3 ± 6.5 | 348.3 ± 15.6 | 33.4 ± 0.2 | 20 ± 0     | 44.9 ± 0.1 |
| <b>Day 3<br/>(TEST<br/>DAY)</b>          | 2125.5 ± 125.9  | 9187.5 ± 432.9 | 2198 ± 103.6   | 83.3 ± 4.1  | 108.7 ± 5.1 | 257.4 ± 12.2 | 33.5 ± 0.2 | 20.1 ± 0   | 44.8 ± 0.1 |
| <b>Day 4</b>                             | 2256.5 ± 114.7  | 9300.3 ± 393.8 | 2225 ± 94.2    | 84.4 ± 3.9  | 109.9 ± 4.6 | 256.7 ± 10.9 | 33.5 ± 0.2 | 20.1 ± 0.1 | 44.2 ± 0.1 |
| <b>Day 5<br/>(TEST<br/>DAY)</b>          | 2147.9 ± 124.4  | 9210.9 ± 425.1 | 2203.6 ± 101.7 | 83.9 ± 4    | 108.6 ± 4.9 | 257.5 ± 12   | 33.7 ± 0.1 | 20.1 ± 0   | 44.7 ± 0.1 |
| <b>Day 6</b>                             | 2124.2 ± 123.2  | 9227.8 ± 420.7 | 2207.6 ± 100.6 | 83 ± 4.1    | 112 ± 4.9   | 255.3 ± 11.7 | 33.2 ± 0.2 | 20.7 ± 0.1 | 44.3 ± 0.1 |
| <b>Day 7<br/>(TEST<br/>DAY)</b>          | 2124 ± 131.4    | 9190.4 ± 454.5 | 2198.7 ± 108.7 | 83.3 ± 4.4  | 108.6 ± 5.2 | 257.6 ± 12.6 | 33.5 ± 0.1 | 20.1 ± 0   | 44.9 ± 0.1 |
| <b>Test day 2<br/>(3 meals<br/>only)</b> | 2162.3 ± 125.5  | 9293.9 ± 431   | 2223.4 ± 103.1 | 83.8 ± 4.1  | 109.7 ± 5   | 261.6 ± 12.1 | 33.3 ± 0.2 | 20.1 ± 0   | 45 ± 0.2   |

Data presented as mean ± SEM. Data for Test Day 2 is presented as 3 meals only [bottom row] and including the additional extra evening snack to maintain a standardised 16 h fast overnight to breakfast [second row from top]. Food weight is in grams per day. Macronutrients are presented both as gram amounts and as a percentage of total daily energy intake.

**Table S2: Energy Expenditure and Post-Prandial Data Between Study Days**

|                                            | Day 2              | Day 3              | Day 5             | Day 7             |
|--------------------------------------------|--------------------|--------------------|-------------------|-------------------|
| <b>DLMO [24 h]</b>                         | 22:36 (± 00:31)    | 00:01 (± 00:34)    | 01:41 (± 00:34)   | 02:18 (± 00:35)   |
| <b>Wake Time to DLMO [h:min]</b>           | 15 h 18min (± 30)  | 11 h 44min (± 30)  | 13 h 25min (± 30) | 14 h 6min (± 32)  |
| <b>Whole Day EE [kJ]</b>                   | 5227.9 (± 200.3)   | 5179 (± 207.8)     | 5263.6 (± 211.9)  | 5289.0 (± 235.9)  |
| <b>Fasting RMR [kJ]</b>                    | 6636.4 (± 280.1)   | 6972.4 (± 314.7)   | 6923 (± 329.7)    | 6731.9 (± 278.4)  |
| <b>TEF [kJ]</b>                            |                    |                    |                   |                   |
| Breakfast                                  | 252.6 (± 23.9)     | 177.0 (± 23.9)     | 198.0 (± 27.8)    | 245.3 (± 35.3)    |
| Lunch                                      | 278.7 (± 33.2)     | 213.7 (± 27.5)     | 234.0 (± 35.8)    | 276.1 (± 33.2)    |
| Dinner                                     | 266.3 (± 28.7)     | 156.9 (± 28.6)     | 214.1 (± 41.0)    | 272.8 (± 35.9)    |
| <b>Gastric Emptying</b>                    |                    |                    |                   |                   |
| T-½ (mins)                                 | 318.1 (± 36.9)     | 408.5 (± 51.9)     | 336.7 (± 48.2)    | 293.3 (± 43.0)    |
| T-Lag (mins)                               | 223.6 (± 27.5)     | 269 (± 36.3)       | 237.1 (± 33.9)    | 211.2 (± 31.6)    |
| <b>Fasting Plasma Glucose (mmol/L)</b>     | 5.6 (± 0.13)       | 5.3 (± 0.13)       | 5.3 (± 0.13)      | 5.4 (± 0.13)      |
| <b>Plasma Glucose iAUC (mmol/L • min)</b>  |                    |                    |                   |                   |
| Breakfast                                  | 149.1 (± 25.8)     | 232.9 (± 25.8)     | 188.2 (± 25.8)    | 172.3 (± 25.8)    |
| Lunch                                      | 139.0 (± 25.8)     | 174.5 (± 25.8)     | 169.2 (± 25.8)    | 161.1 (± 25.8)    |
| Dinner                                     | 117.0 (± 25.8)     | 170.1 (± 25.8)     | 144.7 (± 25.8)    | 127.4 (± 25.8)    |
| <b>Continuous Glucose Monitor (mmol/L)</b> |                    |                    |                   |                   |
| MAGE                                       | 1.72 (± 0.56)      | 1.92 (± 0.60)      | 1.87 (± 0.48)     | N/A               |
| CONGA                                      | 5.32 (± 0.32)      | 5.18 (± 0.31)      | 5.30 (± 0.31)     | N/A               |
| <b>Fasting Plasma Insulin (pmol/L)</b>     | 26.0 (± 3.55)      | 25.2 (± 3.55)      | 27.1 (± 3.55)     | 24.5 (± 3.55)     |
| <b>Plasma Insulin iAUC (pmol/ • min)</b>   |                    |                    |                   |                   |
| Breakfast                                  | 11874.8 (± 1957.4) | 10847.5 (± 1957.4) | 7851.9 (± 1957.4) | 9244.5 (± 1957.4) |
| Lunch                                      | 8766.7 (± 1957.4)  | 10004.2 (± 1957.4) | 7569.3 (± 1957.4) | 6961.5 (± 1957.4) |
| Dinner                                     | 7488.5 (± 1957.4)  | 8267.3 (± 1957.4)  | 6326.5 (± 1957.4) | 7370.6 (± 1957.4) |
| <b>HOMA-IR</b>                             | .43 (± .03)        | .41 (± .02)        | .44 (± .03)       | .38 (± .02)       |
| <b>Fasting Plasma TG (mmol/L)</b>          | 1.4 (± 1.18)       | 1.4 (± 1.18)       | 1.4 (± 1.18)      | 1.4 (± 1.18)      |
| <b>Plasma TG iAUC (mmol/L • min)</b>       |                    |                    |                   |                   |
| Breakfast                                  | 12.7 (± 12.7)      | 14.1 (± 12.5)      | 14.8 (± 12.5)     | 20.7 (± 12.5)     |
| Lunch                                      | 77.0 (± 12.5)      | 123.1 (± 12.5)     | 109.9 (± 12.5)    | 110.1 (± 12.5)    |
| Dinner                                     | 54.0 (± 12.5)      | 81.4 (± 12.5)      | 80.3 (± 12.5)     | 68.8 (± 12.7)     |

**Note:** Data are presented as mean and standard error [SEM]. kJ = kilojoules; DLMO = Dim Light Melatonin Onset; EE = energy expenditure; RMR = resting metabolic rate; TEF = thermic effect of feeding; TG = triglycerides; MAGE = Mean Amplitude of Glycaemic Excursions; CONGA = Continuous Overall Net Glycaemic Action.
